# Supplementary material for: Nuclear-enriched protein phosphatase 4 ensures outer kinetochore assembly prior to nuclear dissolution
Source: PubMed Central journal article supplement — J Cell Biol. 2023 Jan 31;222(3):e202208154. doi: 10.1083/jcb.202208154 (PMC9930252; doi:10.1083/jcb.202208154), 2023-01-31

**A** EVH1 domain of SMK-1

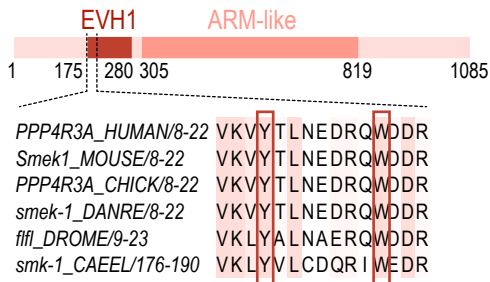

**B** FxxP motifs in HCP-4<sup>CENP-C</sup>

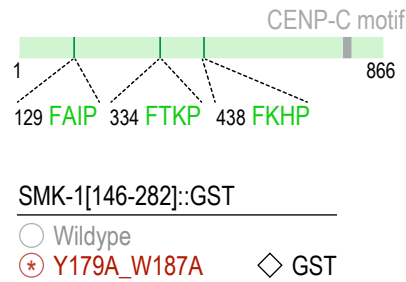

FxxP mutations in full-length HCP-4<sup>CENP-C</sup>

- ① Wild-type
  - ② F129A\_P132A
  - ③ Δ128-135
  - ④ F334A\_P337A
  - ⑤ F438A\_P441A
  - ⑥ F129A\_P132A\_F438A\_P441A
  - ⑦ F129A\_P132A\_F334A\_P337A
  - ⑧ F129A\_P132A\_P441A
  - ⑨ F129A\_P132A\_F334A\_P337A\_P441A
- FXXP → EVH1  
 ↓ AXXA \* → EVH1

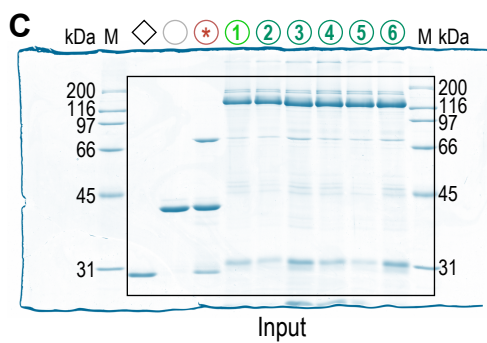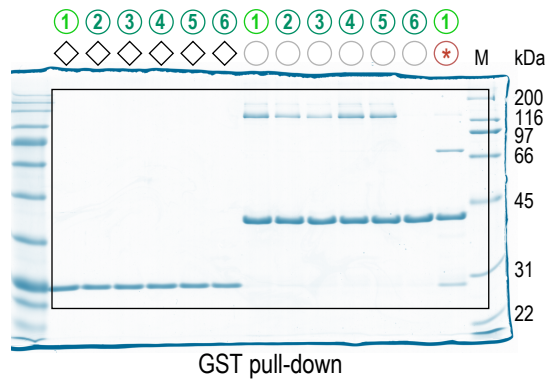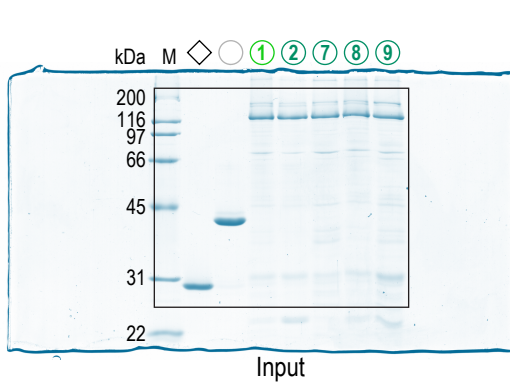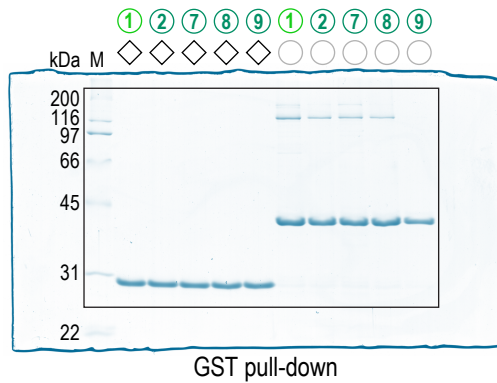

Supplement: JCB_202208154_SourceDataF4.pdf [file JCB_202208154_SourceDataF4.pdf]
